# Supplementary material for: Updated subnational estimates of Water, Sanitation and Hygiene access in Low- and Middle-Income countries: a spatially referenced hierarchical ordinal multinomial modeling analysis using R template model builder
Source: Research Square preprint supplement (doi:10.21203/rs.3.rs-9543036/v1), 2026-04-28
Supplement: Supplementary file 1 [file 7cbea89030e35ad512359f43.xlsx]

## Sheet: Codebook
Variable	Definition	Category label	Category definition	Source
ISO3	Three-letter country code			https://wits.worldbank.org/wits/wits/witshelp/content/codes/country_codes.htm
Country	Country name			https://wits.worldbank.org/wits/wits/witshelp/content/codes/country_codes.htm
Region	Region of the globe as defined by the World Bank	EAP	East Asia and Pacific	https://datatopics.worldbank.org/sdgatlas/archive/2017/the-world-by-region.html
		ECA	Europe and Central Asia
		LAC	Latin America and Caribben
		MENA	Middle East and North Africa
		SA	South Asia
		SSA	Sub-Saharan Africa
Survey	Type and source of survey	DHS	Demographic and Health Survey	https://dhsprogram.com/
		MIS	Malaria Indicator Survey	https://dhsprogram.com/
		AIS	AIDS Indicator Survey	https://dhsprogram.com/
		MICS	Multiple Indicator Cluster Survey	https://mics.unicef.org/surveys
		BFHS	Botswana Family Health Survey	https://microdata.statsbots.org.bw/index.php/catalog/9
		CFPS	China Family Panel Studies	https://opendata.pku.edu.cn/dataverse/CFPS
		ENDESA	Encuesta Nicaragüense de Demografía y Salud	https://www.inide.gob.ni/Home/endesa
		ENSANUT	Encuesta Nacional de Salud y Nutrición	https://www.salud.gob.ec/encuesta-nacional-de-salud-y-nutricion-ensanut/
		PNDS	Pesquisa Nacional de Demografia e Saúde da Criança e da Mulher	https://bvsms.saude.gov.br/bvs/pnds/
Year	Year in which the survey was conducted
Clusters	Number of clusters included in the survey
Households	Number of households included in the survey
Water_Obs	Number of households with information on water source
ImpW_Pipe	Percent of households using piped water as source
ImpW_Grd	Percent of households using groundwater as source
ImpW_Oth	Percent of households using another improved water source
UnimpW_Oth	Percent of households using another unimproved water source
UnimpW_Srf	Percent of households using unimproved surface water as source
Sanitation_Obs	Number of households with information on sanitation facility
ImpS_Sew	Percent of households using latrine with flush to sewer or septic tank
ImpS_Oth	Percent of households using another improved sanitation facility
UnimpS_San	Percent of households using an unimproved sanitation facility
Open_Def	Percent of households practicing open defecation
Hygiene_Obs	Number of households with information on hygiene facility
Hyg_Bas	Percent of households with basic handwashing facility
Hyg_Lim	Percent of households with limited handwashing facility
Hyg_None	Percent of households with no handwashing facility

## Sheet: Survey_summary
ISO3	Country	Region	Survey	Year	Clusters	Households	Water_Obs	ImpW_Grd	ImpW_Oth	ImpW_Pipe	UnimpW_Oth	UnimpW_Srf	Sanitation_Obs	ImpS_Oth	ImpS_Sew	Open_Def	UnimpS_San	Hygiene_Obs	Hyg_Bas	Hyg_Lim	Hyg_None
AFG	Afghanistan	SA	MICS	2011	449	13468	12985	0.331151	0.0492106	0.21263	0.125375	0.281633	12996	0.253309	0.0961065	0.177593	0.472992	13100	0.45916	0.138855	0.401985
AFG	Afghanistan	SA	DHS	2015	956	24168	24143	0.32469	0.125171	0.200596	0.132005	0.217537	23956	0.180205	0.0947571	0.149023	0.576014	24113	0.275204	0.451707	0.273089
AFG	Afghanistan	SA	MICS	2023	972	23338	22865	0.303521	0.0901815	0.287295	0.0720752	0.246928	23027	0.338299	0.0934555	0.214357	0.353889	23213	0.62913	0.300521	0.0703485
AGO	Angola	SSA	MIS	2006	115	2503	2503	0.109069	0.202157	0.248102	0.0827008	0.35797	2497	0.193833	0.211454	0.397677	0.197036	0	0	0	0
AGO	Angola	SSA	MIS	2011	238	7927	7927	0.129179	0.167024	0.308313	0.0425129	0.352971	7854	0.265597	0.189076	0.414184	0.131143	0	0	0	0
AGO	Angola	SSA	DHS	2015	625	16007	15813	0.120534	0.165434	0.328401	0.109151	0.276481	15952	0.186685	0.377006	0.353059	0.0832497	16007	0.218092	0.134754	0.647154
AGO	Angola	SSA	DHS	2023	630	16157	15964	0.138938	0.0979704	0.389564	0.111438	0.26209	16074	0.318465	0.288043	0.362449	0.0310439	16157	0.300737	0.435972	0.263291
ARG	Argentina	LAC	MICS	2012	2087	23791	23630	0.0362251	0.00541684	0.948794	0.00545916	0.00410495	23201	0.0833585	0.862204	0	0.0544373	0	0	0	0
ARG	Argentina	LAC	MICS	2020	940	19420	14907	0.0114711	0.12531	0.862347	0.000402495	0.000469578	14943	0.221508	0.76765	0.00153918	0.00930201	0	0	0	0
ARM	Armenia	ECA	DHS	2005	308	6697	6694	0.00791754	0.0168808	0.955034	0.0201673	0	6690	0.252317	0.702242	0.00119581	0.0442451	0	0	0	0
ARM	Armenia	ECA	DHS	2010	308	6693	6687	0.00882309	0.0601166	0.924779	0.00164498	0.00463586	6692	0.106396	0.722803	0.000597729	0.170203	6691	0.862651	0.0895232	0.0478254
ARM	Armenia	ECA	DHS	2016	313	7889	7889	0.00418304	0.0286475	0.965902	0.000253518	0.00101407	7885	0.0715282	0.701585	0.000126823	0.22676	7889	0.930029	0.0315629	0.0384079
AZE	Azerbaijan	ECA	DHS	2006	318	7159	7157	0.184295	0.193657	0.549672	0.00852312	0.0638536	7137	0.452151	0.373967	0.0028023	0.17108	0	0	0	0
AZE	Azerbaijan	ECA	MICS	2023	616	12360	10792	0.0911787	0.231653	0.608043	0.0152891	0.0538362	10809	0.477935	0.444537	0.000277546	0.0772504	10813	0.970498	0.0162767	0.0132248
BDI	Burundi	SSA	MICS	2005	548	7048	6920	0.00881503	0.469075	0.183382	0.0184971	0.320231	7036	0.278852	0.0379477	0.0309835	0.652217	0	0	0	0
BDI	Burundi	SSA	DHS	2010	376	8506	8506	0.024806	0.402539	0.335881	0.030214	0.20656	8486	0.394532	0.0519679	0.034881	0.518619	8498	0.0763709	0.906213	0.0174159
BDI	Burundi	SSA	MIS	2012	200	4836	4835	0.0395036	0.429576	0.337539	0.0223371	0.171044	4834	0.0978486	0.0550269	0.0268928	0.820232	0	0	0	0
BDI	Burundi	SSA	DHS	2016	554	15868	15868	0.0233804	0.450907	0.357323	0.0178977	0.150492	15868	0.502584	0.0469498	0.0255861	0.42488	15868	0.0604991	0.924502	0.0149987
BEN	Benin	SSA	DHS	2006	750	17324	17257	0.226401	0.0433447	0.433505	0.201483	0.0952657	17301	0.356107	0.0010404	0.633894	0.00895902	0	0	0	0
BEN	Benin	SSA	DHS	2012	750	17422	17422	0.305131	0.0196878	0.45058	0.157732	0.0668695	17419	0.244216	0.0477639	0.589184	0.118836	17422	0.0828837	0.788199	0.128917
BEN	Benin	SSA	MICS	2014	727	14606	14065	0.23235	0.0189833	0.542979	0.152648	0.0530395	13857	0.366746	0.0737533	0.486252	0.0732482	14054	0.118329	0.0237655	0.857905
BEN	Benin	SSA	DHS	2017	555	14022	14022	0.331836	0.0129083	0.378619	0.201754	0.0748823	13931	0.297394	0.0526882	0.54368	0.106238	14022	0.104479	0.450863	0.444658
BEN	Benin	SSA	MICS	2022	793	17448	16711	0.420621	0.0365627	0.310694	0.173957	0.0581653	16727	0.345609	0.0648652	0.487714	0.101811	16790	0.129005	0.0448481	0.826147
BFA	Burkina Faso	SSA	MICS	2006	197	4610	4607	0.560669	0.0134578	0.202084	0.194921	0.0288691	4595	0.0150163	0.00739935	0.689227	0.288357	0	0	0	0
BFA	Burkina Faso	SSA	DHS	2010	573	14424	14414	0.532399	0.0033301	0.255654	0.146385	0.0622312	14405	0.315724	0.0134675	0.613537	0.0572718	14407	0.109808	0.699382	0.19081
BFA	Burkina Faso	SSA	MIS	2014	252	6385	6384	0.552788	0.014881	0.213033	0.16933	0.0499687	6370	0.405965	0.0211931	0.549765	0.0230769	0	0	0	0
BFA	Burkina Faso	SSA	MIS	2017	245	6294	6294	0.515729	0.00619638	0.288688	0.16333	0.0260566	6286	0.493	0.0194082	0.418549	0.0690423	0	0	0	0
BFA	Burkina Faso	SSA	DHS	2021	514	13178	13178	0.492032	0.0152527	0.338746	0.1416	0.0123691	13143	0.624515	0.0189454	0.323138	0.0334018	13178	0.134239	0.677341	0.18842
BGD	Bangladesh	SA	MICS	2006	1950	57668	57484	0.894388	0.00231369	0.070263	0.0076891	0.0253462	57482	0.234804	0.147855	0.0845308	0.53281	0	0	0	0
BGD	Bangladesh	SA	DHS	2007	361	10321	10321	0.88286	0.00155024	0.0824533	0.00581339	0.0273229	10319	0.256517	0.198953	0.0608586	0.483671	0	0	0	0
BGD	Bangladesh	SA	DHS	2011	600	17025	17025	0.857797	0.00704846	0.115653	0.00370044	0.0158003	17024	0.443492	0.125822	0.0415296	0.389156	17021	0.239704	0.734034	0.0262617
BGD	Bangladesh	SA	MICS	2012	2756	55120	51680	0.921556	0.00154799	0.034791	0.011281	0.0308243	51698	0.597683	0.137684	0.0543735	0.21026	51888	0.717449	0.0929309	0.18962
BGD	Bangladesh	SA	DHS	2014	600	17191	17190	0.879523	0.00965678	0.0884235	0.00471204	0.0176847	17187	0.5535	0.149997	0.0315936	0.26491	17185	0	0.993483	0.00651731
BGD	Bangladesh	SA	DHS	2017	672	19354	19354	0.898212	0.00873205	0.0750749	0.00351349	0.0144673	19354	0.438566	0.214374	0.0125555	0.334504	19354	0.382867	0.585925	0.031208
BGD	Bangladesh	SA	MICS	2019	3220	64400	61232	0.87954	0.010501	0.0871766	0.00814933	0.0146329	61223	0.584682	0.248632	0.0193718	0.147314	61242	0.756115	0.0859704	0.157915
BGD	Bangladesh	SA	DHS	2022	674	29930	29930	0.860742	0.0216505	0.107685	0.0017708	0.00815236	29900	0.523679	0.278562	0.0051505	0.192609	29930	0.555663	0.436485	0.00785165
BLZ	Belize	LAC	MICS	2006	120	1238	1230	0.0577236	0.547154	0.376423	0.0105691	0.00813008	1236	0.335761	0.601942	0.0218447	0.0404531	0	0	0	0
BLZ	Belize	LAC	MICS	2011	168	4200	3783	0.0317209	0.603489	0.351308	0.0097806	0.00370077	3783	0.379857	0.585778	0.0229976	0.0113666	3786	0.781828	0.0203381	0.197834
BLZ	Belize	LAC	MICS	2016	188	4522	3946	0.0195134	0.649772	0.317283	0.00633553	0.00709579	3991	0.286144	0.650714	0.0157855	0.0473566	4009	0.823397	0.0229484	0.153654
BOL	Bolivia	LAC	DHS	2008	970	18867	18795	0.0200053	0.0130354	0.828039	0.0781591	0.0607608	0	0	0	0	0	0	0	0	0
BRA	Brazil	LAC	PNDS	2006	1088	14617	12500	0.21712	0.14512	0.59648	0.02664	0.01464	13047	0.217061	0.487009	0.0883728	0.207557	0	0	0	0
BTN	Bhutan	SA	MICS	2010	688	15160	14440	0.00422438	0.0121884	0.945083	0.00221607	0.0362881	14442	0.337419	0.290818	0.0389143	0.332849	14454	0.853674	0.108551	0.037775
BWA	Botswana	SSA	BFHS	2008	288	5760	5190	0.0722543	0.0159923	0.876301	0.0236994	0.0117534	5038	0.210798	0.309448	0.177054	0.302699	0	0	0	0
CAF	Central African Republic	SSA	MICS	2006	355	9185	9168	0.38329	0.0688264	0.156632	0.103949	0.287304	9113	0.487436	0.0111928	0.268408	0.232964	0	0	0	0
CAF	Central African Republic	SSA	MICS	2010	429	11966	11739	0.431894	0.0627822	0.101116	0.12369	0.280518	11652	0.0417954	0.00111569	0.307844	0.649245	11743	0.128247	0.041216	0.830537
CAF	Central African Republic	SSA	MICS	2019	451	8994	8125	0.402831	0.0476308	0.155077	0.122708	0.271754	8117	0.223482	0.00591351	0.26463	0.505975	8121	0.238271	0.124	0.637729
CHN	China	EAP	CFPS	2014	1755	13946	13287	0.252427	0.0204711	0.685181	0.00376308	0.0381576	13405	0.0703469	0.446848	0.0217829	0.461022	0	0	0	0
CIV	Cote d'Ivoire	SSA	AIS	2005	249	907	905	0.359116	0.00331492	0.562431	0.0287293	0.0464088	903	0.660022	0.133998	0.20598	0	0	0	0	0
CIV	Cote d'Ivoire	SSA	MICS	2006	304	6918	6910	0.381766	0.0243126	0.370188	0.128654	0.0950796	6904	0.461616	0.11066	0.338934	0.0887891	0	0	0	0
CIV	Cote d'Ivoire	SSA	DHS	2012	351	9589	9582	0.320705	0.00824463	0.464934	0.132123	0.0739929	9560	0.302615	0.154184	0.344247	0.198954	9574	0.115939	0.732087	0.151974
CIV	Cote d'Ivoire	SSA	MICS	2016	511	12768	11836	0.313873	0.0200237	0.466458	0.12048	0.0791653	11837	0.293824	0.142181	0.278871	0.285123	2068	0.448743	0.0938104	0.457447
CIV	Cote d'Ivoire	SSA	DHS	2021	539	14651	14651	0.388028	0.0325575	0.41574	0.111869	0.0518053	14633	0.365134	0.218752	0.221007	0.195107	14651	0.226401	0.528223	0.245376
CMR	Cameroon	SSA	MICS	2006	466	6540	6531	0.209463	0.0832951	0.397183	0.107794	0.202266	6528	0.25383	0.0814951	0.0657169	0.598958	0	0	0	0
CMR	Cameroon	SSA	DHS	2011	578	14106	14103	0.235269	0.0712614	0.384386	0.0960079	0.213075	14071	0.473954	0.0921043	0.0620425	0.3719	0	0	0	0
CMR	Cameroon	SSA	MICS	2014	475	10748	10199	0.280224	0.0872635	0.400922	0.0637317	0.16786	10198	0.460679	0.121298	0.0538341	0.364189	10209	0.100695	0.0191987	0.880106
CMR	Cameroon	SSA	DHS	2018	430	11639	11639	0.322193	0.0970015	0.368588	0.0899562	0.122261	11637	0.479505	0.140414	0.0431383	0.336943	11639	0.379672	0.572644	0.0476845
CMR	Cameroon	SSA	MIS	2022	444	6008	6008	0.350699	0.121172	0.338881	0.0735686	0.115679	6007	0.467288	0.180456	0.066256	0.286	0	0	0	0
COD	Democratic Republic of Congo	SSA	DHS	2007	300	8735	8735	0.0416714	0.169204	0.270864	0.050601	0.467659	8683	0.793274	0.0530922	0.129909	0.0237245	0	0	0	0
COD	Democratic Republic of Congo	SSA	MICS	2010	383	11490	11338	0.0604163	0.178162	0.271565	0.0470983	0.442759	11368	0.0891098	0.03633	0.165728	0.708832	11391	0.0473181	0.0890176	0.863664
COD	Democratic Republic of Congo	SSA	DHS	2013	536	17976	17970	0.0567056	0.165776	0.185142	0.0671119	0.525264	17958	0.340795	0.0368081	0.168504	0.453892	17960	0.0300668	0.895434	0.0744989
COD	Democratic Republic of Congo	SSA	MICS	2018	709	20810	20682	0.0563292	0.161396	0.164297	0.0856784	0.532299	20698	0.231955	0.0388926	0.173205	0.555947	20792	0.128607	0.292228	0.579165
COD	Democratic Republic of Congo	SSA	DHS	2023	778	26089	26089	0.0907279	0.137376	0.174671	0.0771973	0.520028	26089	0.226111	0.0526659	0.189505	0.531718	26089	0.119782	0.500134	0.380084
COG	Congo	SSA	DHS	2005	225	5811	5811	0.0803648	0.0765789	0.568921	0.0937876	0.180348	5793	0.843777	0.0523045	0.103919	0	0	0	0	0
COG	Congo	SSA	AIS	2009	240	7096	7086	0.112616	0.0999153	0.32162	0.0946938	0.371154	7039	0.798551	0.0254297	0.176019	0	0	0	0	0
COG	Congo	SSA	DHS	2011	384	11551	11541	0.161511	0.114721	0.265488	0.0944459	0.363833	11537	0.195371	0.0356245	0.166768	0.602236	0	0	0	0
COG	Congo	SSA	MICS	2015	531	13275	12793	0.293676	0.103103	0.292895	0.0480732	0.262253	12763	0.256288	0.0750607	0.18679	0.481862	12791	0.426159	0.337659	0.236182
COL	Colombia	LAC	DHS	2005	3864	37136	37136	0.0681549	0.129335	0.758132	0.00745907	0.0369184	37083	0.0514791	0.872421	0.0760996	0	0	0	0	0
COL	Colombia	LAC	DHS	2010	4986	51355	51355	0.0607731	0.15389	0.721624	0.00897673	0.0547366	51323	0.0591548	0.872026	0.068819	0	0	0	0	0
COL	Colombia	LAC	DHS	2015	4878	44555	44555	0.0540456	0.189361	0.685041	0.00931433	0.0622377	44441	0.0461736	0.886096	0.0677302	0	0	0	0	0
COM	Comoros	SSA	DHS	2012	252	4482	4476	0.0623324	0.217605	0.644325	0.0478105	0.0279267	4477	0.26625	0.12017	0.00893455	0.604646	4440	0.168694	0.777928	0.0533784
COM	Comoros	SSA	MICS	2022	357	6801	6124	0.0395167	0.29017	0.652025	0.00669497	0.0115937	6140	0.570684	0.124593	0.0112378	0.293485	6158	0.371224	0.276876	0.3519
CRI	Costa Rica	LAC	MICS	2011	368	6797	5543	0.0286848	0.00685549	0.959408	0.0023453	0.00270612	5502	0.0270811	0.960196	0.000727008	0.0119956	5549	0.78807	0.048297	0.163633
CRI	Costa Rica	LAC	MICS	2018	500	10093	8468	0.0266887	0.0148795	0.955243	0.00129901	0.00188947	8435	0.0119739	0.941197	0.00189686	0.0449318	8490	0.769965	0.0663133	0.163722
CUB	Cuba	LAC	MICS	2006	501	6407	6383	0.176563	0.0491932	0.735234	0.0283566	0.0106533	6396	0.278299	0.68152	0.0129769	0.0272045	0	0	0	0
CUB	Cuba	LAC	MICS	2011	400	9525	9161	0.141033	0.0255431	0.811811	0.0163738	0.0052396	9156	0.193316	0.763761	0.00873744	0.0341852	0	0	0	0
CUB	Cuba	LAC	MICS	2014	400	9958	9429	0.134691	0.030332	0.81366	0.0167568	0.0045604	9466	0.197443	0.760511	0.00591591	0.0361293	9494	0.877502	0.067727	0.0547714
CUB	Cuba	LAC	MICS	2019	454	10896	10384	0.178833	0.0547958	0.74923	0.0114599	0.00568182	10392	0.167821	0.698999	0.00952656	0.123653	10410	0.911816	0.0685879	0.0195965
DJI	Djibouti	MENA	MICS	2006	215	4289	4208	0.0363593	0.0323194	0.859791	0.0472909	0.0242395	4244	0.501414	0.125825	0.10509	0.267672	0	0	0	0
DOM	Dominican Republic	LAC	DHS	2007	1358	30879	30863	0.0283511	0.652464	0.2804	0.00463338	0.0341509	30777	0.351399	0.479124	0.0598824	0.109595	0	0	0	0
DOM	Dominican Republic	LAC	DHS	2013	524	11426	11425	0.0139168	0.806039	0.159475	0.00472648	0.0158425	11420	0.277583	0.636165	0.0515762	0.034676	0	0	0	0
DOM	Dominican Republic	LAC	MICS	2014	2075	33097	30997	0.0139368	0.840533	0.123141	0.00203245	0.0203568	30934	0.295371	0.654684	0.0393095	0.0106355	31126	0.414573	0.0796119	0.505815
DOM	Dominican Republic	LAC	MICS	2019	1747	34982	31316	0.00874952	0.890631	0.0853238	0.00185209	0.0134436	31323	0.212655	0.711075	0.03681	0.0394598	31488	0.52763	0.138243	0.334127
DZA	Algeria	MENA	MICS	2013	1120	28000	27099	0.0664969	0.204177	0.712314	0.00535075	0.0116609	26797	0.0674329	0.890547	0.0223159	0.0197037	27187	0.816824	0.0772796	0.105896
DZA	Algeria	MENA	MICS	2019	1253	31325	29857	0.0654788	0.327226	0.59939	0.0033493	0.00455505	29896	0.0463273	0.907647	0.00799438	0.0380318	29919	0.845115	0.082456	0.0724289
ECU	Ecuador	LAC	ENSANUT	2018	2590	43311	42129	0.037219	0.319115	0.609746	0	0.0339196	43311	0.007019	0.879638	0.0368728	0.0764702	43311	0.768119	0.0742537	0.157627
EGY	Egypt	MENA	DHS	2005	1296	21006	21002	0.0314256	0.0109037	0.94891	0.00876107	0	20983	0.55788	0.422914	0.019206	0	0	0	0	0
EGY	Egypt	MENA	DHS	2008	1122	16675	16674	0.0284275	0.0144536	0.956519	0.000479789	0.000119947	16660	0.516447	0.477971	0.00486194	0.000720288	0	0	0	0
EGY	Egypt	MENA	DHS	2014	1835	28082	28081	0.00929454	0.0390299	0.943627	0.00794131	0.000106834	28058	0.186649	0.76071	0.00146126	0.0511797	28077	0.863554	0.10603	0.0304164
ETH	Ethiopia	SSA	DHS	2005	396	9745	9744	0.0597291	0.322147	0.200739	0.142036	0.275349	9734	0.0704746	0.00184919	0.656051	0.271625	0	0	0	0
ETH	Ethiopia	SSA	DHS	2011	412	11454	11450	0.157817	0.101834	0.265328	0.0559825	0.419039	11427	0.146758	0.0094513	0.461451	0.38234	11454	0.00707177	0.976602	0.0163262
ETH	Ethiopia	SSA	DHS	2016	642	16491	16491	0.196228	0.102541	0.411194	0.0596083	0.230429	16411	0.229297	0.027969	0.353056	0.389678	16491	0.0941726	0.449397	0.456431
ETH	Ethiopia	SSA	DHS	2019	305	8578	8578	0.0817207	0.129051	0.506878	0.0533924	0.228958	8558	0.232998	0.0362234	0.328581	0.402197	0	0	0	0
FJI	Fiji	EAP	MICS	2021	300	6000	5448	0.017254	0.0374449	0.926395	0.00146843	0.0174376	5452	0.120506	0.862436	0.00183419	0.0152238	5467	0.907445	0.067313	0.0252424
GAB	Gabon	SSA	DHS	2012	336	9703	9672	0.00785773	0.152192	0.587055	0.105149	0.147746	9669	0.213776	0.175923	0.0284414	0.58186	0	0	0	0
GAB	Gabon	SSA	DHS	2019	352	10545	10539	0.052282	0.0897618	0.612107	0.037385	0.208464	10543	0.240254	0.283695	0.0142274	0.461823	10545	0.426268	0.47046	0.103272
GEO	Georgia	ECA	MICS	2005	474	7685	7669	0.154779	0.0701526	0.731777	0.0221672	0.021124	7682	0.576803	0.393387	0	0.0298099	0	0	0	0
GEO	Georgia	ECA	MICS	2018	706	14120	12185	0.0929011	0.0627821	0.816578	0.0190398	0.00869922	12224	0.381954	0.515461	0.00139071	0.101194	12270	0.897637	0.0625917	0.0397718
GHA	Ghana	SSA	MICS	2006	300	4336	4286	0.387308	0.143257	0.356976	0.0599627	0.0524965	4332	0.463527	0.0930286	0.313019	0.130425	0	0	0	0
GHA	Ghana	SSA	DHS	2008	411	11732	11731	0.368426	0.0934277	0.4015	0.0231864	0.11346	11711	0.540603	0.113654	0.243788	0.101955	0	0	0	0
GHA	Ghana	SSA	MICS	2011	810	12150	11589	0.420744	0.154112	0.264389	0.061869	0.0988869	11919	0.37931	0.096149	0.399195	0.125346	11925	0.121426	0.0966876	0.781887
GHA	Ghana	SSA	DHS	2014	427	11771	11771	0.340413	0.232096	0.30915	0.0302438	0.0880979	11769	0.518736	0.163735	0.23273	0.084799	11771	0.18656	0.715997	0.0974429
GHA	Ghana	SSA	MIS	2016	200	5824	5824	0.255151	0.258585	0.345982	0.0381181	0.102163	5824	0.481628	0.183379	0.224588	0.110405	0	0	0	0
GHA	Ghana	SSA	MICS	2018	660	13202	12874	0.323365	0.274584	0.283673	0.0323132	0.0860649	12843	0.392276	0.190454	0.252433	0.164837	12886	0.487195	0.237001	0.275803
GHA	Ghana	SSA	MIS	2019	200	5782	5782	0.291768	0.324109	0.300069	0.024559	0.059495	5781	0.476907	0.200138	0.208268	0.114686	0	0	0	0
GHA	Ghana	SSA	DHS	2022	618	17863	17863	0.307059	0.310362	0.243464	0.0300621	0.109052	17830	0.401514	0.17751	0.287549	0.133427	17863	0.404859	0.457874	0.137267
GIN	Guinea	SSA	DHS	2005	295	6172	6161	0.50349	0.0188281	0.206298	0.00762863	0.263756	6158	0.656707	0.0217603	0.302371	0.0191621	0	0	0	0
GIN	Guinea	SSA	DHS	2012	300	7024	7019	0.481977	0.0219404	0.237783	0.0671036	0.191195	7019	0.314575	0.137057	0.187919	0.36045	7022	0.0699231	0.7364	0.193677
GIN	Guinea	SSA	MICS	2016	419	8380	8080	0.508168	0.0362624	0.248515	0.0462871	0.160767	8073	0.387712	0.0938932	0.164375	0.35402	7935	0.12552	0.477505	0.396975
GIN	Guinea	SSA	DHS	2018	401	7814	7814	0.525851	0.0442795	0.219222	0.0537497	0.156898	7814	0.401715	0.108523	0.142565	0.347197	7814	0.191963	0.509982	0.298055
GIN	Guinea	SSA	MIS	2021	169	3952	3952	0.535425	0.0541498	0.200911	0.0579453	0.151569	3952	0.452176	0.0870445	0.112095	0.348684	0	0	0	0
GMB	Gambia	SSA	MICS	2005	226	3598	3542	0.361378	0.00141163	0.495765	0.141446	0	3584	0.744978	0.0675223	0.0597098	0.12779	0	0	0	0
GMB	Gambia	SSA	MICS	2010	390	7800	7787	0.246436	0.00166945	0.625401	0.126108	0.000385257	7752	0.582946	0.189112	0.0495356	0.178406	7790	0.128498	0.203081	0.668421
GMB	Gambia	SSA	DHS	2013	281	6217	6212	0.184482	0.00450741	0.719575	0.0901481	0.00128783	6201	0.345428	0.237059	0.0277375	0.389776	6194	0.0547304	0.933807	0.0114627
GMB	Gambia	SSA	MICS	2018	390	7750	7397	0.156144	0.00554279	0.751926	0.0853049	0.00108152	7394	0.293075	0.283203	0.0178523	0.40587	7405	0.378528	0.538825	0.0826469
GMB	Gambia	SSA	DHS	2019	280	6512	6512	0.131143	0.0104423	0.811271	0.0471437	0	6497	0.327382	0.325997	0.0144682	0.332153	6512	0.0988943	0.787162	0.113943
GNB	Guinea-Bissau	SSA	MICS	2006	275	3954	3949	0.431502	0.0124082	0.0731831	0.448468	0.0344391	3908	0.0258444	0.017912	0.400461	0.555783	0	0	0	0
GNB	Guinea-Bissau	SSA	MICS	2014	287	5740	5597	0.452743	0.00857602	0.204753	0.30963	0.0242987	5570	0.0402154	0.0346499	0.29246	0.632675	5601	0.0737368	0.0753437	0.850919
GNB	Guinea-Bissau	SSA	MICS	2019	328	6560	6465	0.334725	0.0137664	0.217788	0.406032	0.0276875	6461	0.0592787	0.0507661	0.185265	0.70469	6470	0.098609	0.0574961	0.843895
GTM	Guatemala	LAC	DHS	2015	858	21308	21308	0.00699268	0.291299	0.573634	0.096912	0.031162	21304	0.348526	0.580548	0.0674521	0.00347353	21300	0.760376	0.207934	0.0316901
GUY	Guyana	LAC	AIS	2005	120	2607	2546	0.0184603	0.435978	0.46033	0.0750196	0.0102121	2561	0.390082	0.535338	0.00976181	0.0648184	0	0	0	0
GUY	Guyana	LAC	MICS	2006	220	3809	3766	0.0390335	0.404142	0.419012	0.0451407	0.0926713	3783	0.583135	0.374042	0.0362146	0.00660851	0	0	0	0
GUY	Guyana	LAC	DHS	2009	325	5608	5602	0.0389147	0.542485	0.325241	0.022135	0.0712246	5596	0.433881	0.468728	0.0191208	0.0782702	0	0	0	0
GUY	Guyana	LAC	MICS	2014	296	5904	5061	0.0339854	0.624778	0.271488	0.0274649	0.0422841	5056	0.326345	0.606804	0.0130538	0.0537975	5067	0.698836	0.0578251	0.243339
GUY	Guyana	LAC	MICS	2020	417	8285	7023	0.0392994	0.60729	0.29859	0.023779	0.0310409	7065	0.323567	0.642463	0.0117481	0.0222222	7072	0.774463	0.0606618	0.164876
HND	Honduras	LAC	DHS	2005	1046	18347	18346	0.146026	0.23204	0.568843	0.0530906	0	18278	0.246909	0.374494	0.207463	0.171135	0	0	0	0
HND	Honduras	LAC	DHS	2011	1148	21362	21359	0.0375486	0.334285	0.49801	0.0124069	0.117749	21350	0.2437	0.486838	0.126183	0.143279	21356	0.785868	0.143238	0.0708934
HND	Honduras	LAC	MICS	2019	1221	24643	20425	0.0264382	0.484015	0.460073	0.00651163	0.0229621	20591	0.349764	0.537565	0.0982954	0.0143752	20669	0.836567	0.109101	0.0543326
HTI	Haiti	LAC	DHS	2006	339	9909	9065	0.113183	0.140099	0.394374	0.0440154	0.308329	8720	0.272018	0.0474771	0.431422	0.249083	0	0	0	0
HTI	Haiti	LAC	DHS	2012	400	11774	11756	0.00714529	0.300527	0.28411	0.0893161	0.318901	11741	0.422536	0.0693297	0.292053	0.21608	11772	0.199032	0.6456	0.155369
HTI	Haiti	LAC	DHS	2016	450	13315	13315	0.0687195	0.371311	0.26196	0.0285392	0.269471	13266	0.409543	0.0916629	0.290969	0.207825	13315	0.199474	0.619226	0.181299
IDN	Indonesia	EAP	DHS	2007	1694	40448	40421	0.364959	0.154697	0.187353	0.11969	0.173301	38408	0.191731	0.585399	0.22287	0	0	0	0	0
IDN	Indonesia	EAP	DHS	2012	1832	43664	43642	0.173846	0.346616	0.132647	0.202878	0.144013	42627	0.167546	0.67286	0.159594	0	43629	0.693186	0.275092	0.031722
IDN	Indonesia	EAP	DHS	2017	1970	47773	47770	0.289784	0.495792	0.111116	0.0525434	0.0507641	47738	0.116406	0.702166	0.0997528	0.081675	47762	0.864327	0.0736778	0.0619949
IND	India	SA	DHS	2006	3850	108492	108483	0.326512	0.0334707	0.506688	0.0858936	0.047436	108086	0.126982	0.426725	0.380688	0.0656052	0	0	0	0
IND	India	SA	DHS	2015	28480	598198	598198	0.416593	0.050505	0.446023	0.0569176	0.0299617	597099	0.186306	0.394705	0.381297	0.0376922	598198	0.583395	0.410219	0.00638585
IND	India	SA	DHS	2020	30099	633334	633334	0.37038	0.054442	0.486637	0.0656241	0.0229168	631427	0.272214	0.52321	0.181416	0.0231602	633334	0.693997	0.271726	0.0342773
IRQ	Iraq	MENA	MICS	2006	3023	16699	15760	0.0201777	0.0677665	0.836929	0.00374365	0.0713832	16672	0.28089	0.643294	0.0209933	0.0548225	0	0	0	0
IRQ	Iraq	MENA	MICS	2011	3658	36592	35556	0.0479244	0.311621	0.603527	0.000956238	0.0359714	35613	0.355376	0.597478	0.0125797	0.034566	35699	0.905908	0.0174795	0.0766128
IRQ	Iraq	MENA	MICS	2018	1710	20521	20154	0.0140419	0.464275	0.513893	0.000198472	0.00759155	20176	0.660042	0.285339	0.00133822	0.0532811	20214	0.972148	0.01682	0.011032
JAM	Jamaica	LAC	MICS	2005	148	1010	993	0	0.120846	0.865055	0	0.0140987	1006	0.627237	0.343936	0.00397614	0.0248509	0	0	0	0
JAM	Jamaica	LAC	MICS	2011	236	4751	3865	0.00465718	0.218111	0.748512	0.000776197	0.0279431	3906	0.633129	0.352023	0.00640041	0.00844854	3912	0.594581	0.0541922	0.351227
JAM	Jamaica	LAC	MICS	2022	161	3277	2927	0.00204988	0.380936	0.612231	0.000341647	0.00444141	2924	0.584131	0.398769	0.00547196	0.0116279	2930	0.729693	0.0532423	0.217065
JOR	Jordan	MENA	DHS	2007	930	14524	14524	0	0.201184	0.79138	0.00117048	0.00626549	14524	0.238984	0.752066	0.00302947	0.00592123	0	0	0	0
JOR	Jordan	MENA	DHS	2009	929	13522	13522	0	0.297293	0.695829	0.000517675	0.00636001	13522	0.0161958	0.982917	0.000665582	0.000221861	0	0	0	0
JOR	Jordan	MENA	DHS	2012	806	15148	15148	0	0.443821	0.545815	0	0.0103644	15148	0.50845	0.491022	0.000330077	0.000198046	0	0	0	0
JOR	Jordan	MENA	DHS	2017	970	18745	18745	0	0.431048	0.565591	0	0.0033609	18745	0.409389	0.58853	0.000106695	0.00197386	0	0	0	0
JOR	Jordan	MENA	DHS	2023	969	19439	19439	0	0.460466	0.536344	0	0.00318946	19439	0.373013	0.625084	0.000720202	0.00118319	0	0	0	0
KAZ	Kazakhstan	ECA	MICS	2006	625	10671	10504	0.255522	0.023134	0.693355	0.00837776	0.0196116	10664	0.606902	0.385878	0.000187547	0.00703301	0	0	0	0
KAZ	Kazakhstan	ECA	MICS	2010	780	16380	15718	0.155491	0.0464436	0.779488	0.00585316	0.0127243	15781	0.468792	0.524808	0.000570306	0.0058298	0	0	0	0
KAZ	Kazakhstan	ECA	MICS	2015	839	16791	16490	0.104245	0.0879321	0.804184	0.000970285	0.00266828	16480	0.426274	0.57324	0.000364078	0.000121359	16500	0.970545	0.004	0.0254545
KAZ	Kazakhstan	ECA	MICS	2024	1000	24000	21469	0.0633006	0.0348875	0.898179	0.00135078	0.00228236	22448	0.249644	0.732315	0.000267284	0.0177744	22454	0.839539	0.0996259	0.0608355
KEN	Kenya	SSA	DHS	2008	398	8975	8975	0.188524	0.112089	0.367354	0.0630641	0.268969	8971	0.361498	0.141679	0.165756	0.331067	0	0	0	0
KEN	Kenya	SSA	DHS	2014	1594	36229	36222	0.156093	0.149909	0.370493	0.0854729	0.238032	36127	0.398455	0.084203	0.15869	0.358651	17300	0.115665	0.507861	0.376474
KEN	Kenya	SSA	MIS	2015	182	4739	4739	0.157417	0.126609	0.440599	0.056974	0.218401	4736	0.447846	0.110431	0.133235	0.308488	0	0	0	0
KEN	Kenya	SSA	MIS	2020	298	7938	7938	0.161124	0.195137	0.366339	0.0404384	0.236961	7934	0.525838	0.113562	0.0754979	0.285102	0	0	0	0
KEN	Kenya	SSA	DHS	2022	1691	37738	37738	0.155149	0.226403	0.387037	0.0412052	0.190206	37680	0.533838	0.134979	0.101539	0.229644	37737	0.429366	0.238705	0.331929
KGZ	Kyrgyzstan	ECA	MICS	2005	400	4596	4578	0.0963303	0.0054609	0.785277	0.00436872	0.108563	4595	0.785201	0.183243	0.000435256	0.0311208	0	0	0	0
KGZ	Kyrgyzstan	ECA	DHS	2012	316	8028	8023	0.0674311	0.0262994	0.780506	0.0150816	0.110682	8027	0.849882	0.132054	0.00012458	0.0179395	8023	0.872866	0.126387	0.00074785
KGZ	Kyrgyzstan	ECA	MICS	2014	398	7190	6925	0.0376895	0.0134296	0.834368	0.00361011	0.110903	6918	0.805435	0.193987	0.00014455	0.000433651	6933	0.927737	0.0197606	0.0525025
KGZ	Kyrgyzstan	ECA	MICS	2018	360	7200	6964	0.0531304	0.00459506	0.897473	0.00100517	0.0437967	6968	0.753731	0.244834	0	0.00143513	6968	0.967566	0.0130597	0.0193743
KGZ	Kyrgyzstan	ECA	MICS	2023	360	7200	6639	0.0564844	0.0131044	0.901039	0.00150625	0.0278656	6639	0.720892	0.273836	0	0.00527188	6639	0.941557	0.0207863	0.0376563
KHM	Cambodia	EAP	DHS	2005	557	14103	0	0	0	0	0	0	14071	0.0273612	0.22358	0.723118	0.0259399	0	0	0	0
KHM	Cambodia	EAP	DHS	2010	611	15568	0	0	0	0	0	0	15505	0.0404386	0.405418	0.534408	0.0197356	0	0	0	0
KHM	Cambodia	EAP	DHS	2014	611	15770	0	0	0	0	0	0	15766	0.021058	0.559812	0.408157	0.010973	15770	0.71617	0.28085	0.00298034
KHM	Cambodia	EAP	DHS	2021	709	20763	20763	0.25006	0.42176	0.193325	0.0477291	0.0871261	20725	0.0420265	0.794741	0.147117	0.0161158	20763	0.801377	0.0590473	0.139575
KIR	Kiribati	EAP	MICS	2019	164	3280	3046	0.184504	0.288903	0.280039	0.246553	0	3047	0.173942	0.352806	0.41024	0.0630128	3071	0.62846	0.215239	0.156301
LAO	Laos	EAP	MICS	2006	300	5432	5422	0.168019	0.22962	0.204353	0.188491	0.209517	5431	0.297735	0.141042	0.512981	0.0482416	0	0	0	0
LAO	Laos	EAP	MICS	2012	998	19960	18693	0.155299	0.372011	0.25325	0.107313	0.112128	18747	0.384382	0.215661	0.369392	0.0305649	0	0	0	0
LAO	Laos	EAP	MICS	2017	1165	23299	22269	0.102295	0.63429	0.107728	0.0510575	0.10463	22155	0.636877	0.106928	0.225186	0.0310088	22287	0.53686	0.374434	0.0887064
LAO	Laos	EAP	MICS	2023	1050	20993	20283	0.0964354	0.665631	0.121185	0.0281024	0.0886457	20258	0.696712	0.177954	0.111808	0.0135255	20264	0.621003	0.326342	0.052655
LBR	Liberia	SSA	DHS	2007	298	6746	6739	0.574121	0.0324974	0.0528268	0.110699	0.229856	6662	0.158511	0.0959171	0.55704	0.188532	0	0	0	0
LBR	Liberia	SSA	MIS	2009	150	4124	4120	0.637621	0.0186893	0.0565534	0.057767	0.229369	4106	0.330005	0.0764735	0.45056	0.142962	0	0	0	0
LBR	Liberia	SSA	MIS	2011	150	4128	4125	0.656727	0.0193939	0.0441212	0.0751515	0.204606	4115	0.173269	0.108384	0.457837	0.26051	0	0	0	0
LBR	Liberia	SSA	DHS	2013	322	9333	9327	0.627855	0.0383832	0.0106143	0.0618634	0.261284	9317	0.260921	0.0762048	0.555758	0.107116	9316	0.00837269	0.254616	0.737012
LBR	Liberia	SSA	MIS	2016	150	4186	4185	0.617204	0.113501	0.0547192	0.0198327	0.194743	4179	0.174683	0.195023	0.427136	0.203159	0	0	0	0
LBR	Liberia	SSA	DHS	2019	325	8966	8966	0.662391	0.0150569	0.0312291	0.116886	0.174437	8945	0.184125	0.168809	0.454667	0.192398	8966	0.0165068	0.157707	0.825786
LBR	Liberia	SSA	MIS	2022	150	4274	4274	0.611839	0.14015	0.051474	0.0240992	0.172438	4264	0.21318	0.20333	0.419794	0.163696	0	0	0	0
LCA	Saint Lucia	LAC	MICS	2012	100	2009	1718	0	0.305006	0.688009	0.000582072	0.00640279	1715	0.173178	0.79242	0.0297376	0.00466472	1718	0.852736	0.0436554	0.103609
LSO	Lesotho	SSA	DHS	2009	400	9269	9263	0.103962	0.049552	0.630789	0.13473	0.0809673	9222	0.323249	0.0185426	0.40848	0.249729	0	0	0	0
LSO	Lesotho	SSA	DHS	2014	399	9314	9314	0.0742968	0.0471333	0.7172	0.0666738	0.0946962	9314	0.643977	0.0282371	0.315761	0.0120249	9314	0.0243719	0.0511059	0.924522
LSO	Lesotho	SSA	MICS	2018	400	10413	8819	0.0416147	0.0594172	0.779567	0.0167819	0.102619	8819	0.663341	0.0252863	0.250369	0.0610046	8847	0.1405	0.667119	0.192382
LSO	Lesotho	SSA	DHS	2023	400	9765	9765	0.0560164	0.0387097	0.797133	0.056426	0.0517153	9743	0.572308	0.0396182	0.227035	0.161039	9765	0.203277	0.129647	0.667076
MDG	Madagascar	SSA	DHS	2008	594	17709	17704	0.120707	0.0283552	0.29129	0.168719	0.390929	17693	0.0171819	0.041881	0.478155	0.462782	0	0	0	0
MDG	Madagascar	SSA	MIS	2011	267	8064	8064	0.145337	0.0502232	0.274678	0.105655	0.424107	8064	0.0348462	0.0434028	0.528894	0.392857	0	0	0	0
MDG	Madagascar	SSA	MIS	2013	274	8541	8541	0.171994	0.0512821	0.230535	0.164618	0.381571	8537	0.0540002	0.0329155	0.534263	0.378822	0	0	0	0
MDG	Madagascar	SSA	MIS	2016	358	11259	11259	0.154987	0.0558664	0.246292	0.148059	0.394795	11259	0.111111	0.0289546	0.389466	0.470468	0	0	0	0
MDG	Madagascar	SSA	MICS	2018	774	20117	17838	0.138917	0.0435026	0.207254	0.161565	0.448761	17852	0.107047	0.0304728	0.465998	0.396482	17870	0.237829	0.415109	0.347062
MDG	Madagascar	SSA	DHS	2021	650	20317	20317	0.169169	0.044101	0.26687	0.132844	0.387016	20290	0.251799	0.061656	0.365007	0.321538	20317	0.186199	0.68642	0.127381
MDV	Maldives	SA	DHS	2009	185	4445	4229	0.0075668	0.859305	0.124143	0.00898558	0	4302	0.234542	0.741516	0.0106927	0.0132497	0	0	0	0
MDV	Maldives	SA	DHS	2016	181	3975	3932	0.00203459	0.846134	0.148271	0.00356053	0	3970	0.0115869	0.964736	0.00151134	0.0221662	3975	0.929811	0.0266667	0.043522
MEX	Mexico	LAC	MICS	2015	531	11825	10754	0.0296634	0.698252	0.259903	0.00725312	0.0049284	10743	0.114121	0.854603	0.0162897	0.0149865	10760	0.874071	0.0469331	0.0789963
MLI	Mali	SSA	DHS	2006	407	12733	12723	0.295449	0.00848856	0.250098	0.387644	0.0583196	12696	0.716761	0.02615	0.257089	0	0	0	0	0
MLI	Mali	SSA	MICS	2009	932	13980	13786	0.282751	0.00725374	0.35877	0.277238	0.0739881	13748	0.34645	0.0410241	0.195374	0.417152	13843	0.114715	0.144477	0.740808
MLI	Mali	SSA	DHS	2012	413	9994	9994	0.364018	0.0055033	0.312588	0.290875	0.0270162	9994	0.402241	0.0381229	0.113468	0.446168	9993	0.104973	0.832283	0.0627439
MLI	Mali	SSA	MICS	2015	594	12460	11814	0.323176	0.0110885	0.365922	0.237092	0.0627222	11815	0.410918	0.0552687	0.136267	0.397545	11042	0.0817787	0.686289	0.231933
MLI	Mali	SSA	MIS	2015	177	4219	4219	0.317611	0.0116141	0.381607	0.267125	0.0220431	4216	0.412002	0.0315465	0.0868121	0.469639	0	0	0	0
MLI	Mali	SSA	DHS	2018	345	9420	9420	0.300849	0.0601911	0.35966	0.219958	0.0593418	9401	0.501011	0.0348899	0.141793	0.322306	9420	0.147665	0.593206	0.25913
MLI	Mali	SSA	MIS	2021	224	5615	5615	0.37008	0.0324132	0.423152	0.152983	0.0213713	5614	0.456181	0.0525472	0.149982	0.34129	0	0	0	0
MLI	Mali	SSA	DHS	2023	407	9606	9606	0.35634	0.0273787	0.44212	0.150635	0.023527	9605	0.600104	0.0503904	0.139407	0.210099	9606	0.164168	0.587029	0.248803
MMR	Myanmar	EAP	DHS	2016	441	12446	12446	0.482324	0.200707	0.140366	0.0929616	0.0836413	12407	0.544451	0.0626259	0.114532	0.278391	12446	0.766029	0.169452	0.0645187
MNG	Mongolia	EAP	MICS	2005	253	5908	5709	0.397793	0.074619	0.263794	0.0802242	0.18357	5905	0.560203	0.209483	0.139373	0.0909399	0	0	0	0
MNG	Mongolia	EAP	MICS	2010	187	4675	4435	0.293574	0.248478	0.436077	0.00744081	0.0144307	4443	0.697052	0.283142	0.015305	0.00450146	4447	0.751968	0.046998	0.201034
MNG	Mongolia	EAP	MICS	2016	620	15500	14665	0.367542	0.181725	0.303239	0.0353222	0.112172	14771	0.615192	0.224968	0.101821	0.0580191	14805	0.758663	0.0865248	0.154813
MNG	Mongolia	EAP	MICS	2018	580	14500	13672	0.380486	0.27187	0.181246	0.0352545	0.131144	13770	0.639942	0.191866	0.120552	0.0476398	13796	0.809003	0.160844	0.0301537
MOZ	Mozambique	SSA	MICS	2008	715	11310	11277	0.186308	0.00425645	0.308238	0.360202	0.140995	7468	0.28602	0.10458	0	0.6094	0	0	0	0
MOZ	Mozambique	SSA	AIS	2009	270	6097	6080	0.232237	0.0108553	0.352303	0.271546	0.133059	5976	0.309237	0.0704485	0.335509	0.284806	0	0	0	0
MOZ	Mozambique	SSA	DHS	2011	610	13919	13919	0.181981	0.0173145	0.390114	0.280911	0.129679	13919	0.316761	0	0.341045	0.342194	13919	0.135283	0.851067	0.0136504
MOZ	Mozambique	SSA	AIS	2015	306	7116	7116	0.231731	0.012226	0.442383	0.187886	0.125773	7085	0.267466	0.12844	0.236133	0.36796	0	0	0	0
MOZ	Mozambique	SSA	MIS	2018	224	6156	6156	0.171053	0.0393112	0.483593	0.198181	0.107862	6133	0.314854	0.132398	0.223382	0.329366	0	0	0	0
MOZ	Mozambique	SSA	DHS	2022	617	14131	14131	0.235298	0.0355247	0.419079	0.226877	0.0832213	12650	0.254466	0.0732016	0.256917	0.415415	14131	0.192909	0.548652	0.258439
MRT	Mauritania	SSA	MICS	2007	439	8584	8402	0.15175	0.258272	0.331469	0.227684	0.030826	8526	0.204433	0.15658	0.481117	0.15787	0	0	0	0
MRT	Mauritania	SSA	MICS	2011	516	10320	10027	0.0536551	0.197168	0.455869	0.276354	0.0169542	9919	0.328864	0.111201	0.438956	0.12098	10100	0.353564	0.160495	0.485941
MRT	Mauritania	SSA	MICS	2015	414	11874	11724	0.109775	0.203344	0.521324	0.140652	0.0249062	11666	0.477627	0.0292302	0.385222	0.10792	11716	0.141772	0.659355	0.198873
MRT	Mauritania	SSA	DHS	2020	1200	11624	11624	0.0918789	0.130162	0.60831	0.134463	0.0351858	11606	0.363519	0.232121	0.338704	0.0656557	11624	0.408035	0.363902	0.228063
MWI	Malawi	SSA	MICS	2006	1038	23165	23158	0.576172	0.00397271	0.179636	0.163745	0.0764747	23097	0.105468	0.0211283	0.130623	0.74278	0	0	0	0
MWI	Malawi	SSA	DHS	2010	849	24422	24416	0.595839	0.0048329	0.198026	0.143267	0.0580357	24294	0.0923685	0.021281	0.122129	0.764222	0	0	0	0
MWI	Malawi	SSA	MIS	2012	140	3382	3382	0.510645	0.00413956	0.31165	0.123596	0.0499704	3353	0.2034	0.0504026	0.124963	0.621235	0	0	0	0
MWI	Malawi	SSA	MICS	2013	1066	26654	24989	0.693665	0.00328144	0.156709	0.100004	0.0463404	24946	0.0678265	0.0140704	0.0652209	0.852882	24992	0.0637804	0.0501761	0.886044
MWI	Malawi	SSA	MIS	2014	140	3400	3400	0.516471	0.000294118	0.339118	0.101176	0.0429412	3392	0.150354	0.0477594	0.0922759	0.709611	0	0	0	0
MWI	Malawi	SSA	DHS	2015	798	24629	24629	0.646311	0.003167	0.213691	0.0821795	0.054651	24623	0.801568	0.0233115	0.0624619	0.112659	24629	0.0954566	0.743311	0.161233
MWI	Malawi	SSA	MIS	2017	150	3702	3702	0.452728	0.00297137	0.432199	0.0613182	0.0507834	3697	0.20422	0.0668109	0.0478767	0.681093	0	0	0	0
MWI	Malawi	SSA	MICS	2020	1030	24769	23407	0.723459	0.00683556	0.141069	0.073226	0.0554108	23294	0.77007	0.0130076	0.0815231	0.1354	23425	0.30412	0.410245	0.285635
MWI	Malawi	SSA	DHS	2024	747	21658	21658	0.646043	0.00387847	0.245729	0.0633022	0.0410472	21576	0.500649	0.036244	0.0519559	0.411151	21658	0.0986241	0.34306	0.558316
NAM	Namibia	SSA	DHS	2006	500	9135	9135	0.120088	0.0229885	0.749425	0.0463054	0.0611932	9124	0.0897633	0.354779	0.50811	0.0473477	0	0	0	0
NAM	Namibia	SSA	DHS	2013	550	9805	9793	0.109874	0.0158276	0.759931	0.0718881	0.0424793	9780	0.102658	0.380879	0.474744	0.0417178	9801	0.481073	0.467401	0.0515254
NER	Niger	SSA	DHS	2006	342	7564	7561	0.162545	0.00145483	0.333157	0.487237	0.0156064	7563	0.260875	0.029089	0.710036	0	0	0	0	0
NER	Niger	SSA	DHS	2012	476	10750	10722	0.299478	0.00167879	0.398899	0.283622	0.0163216	10732	0.221673	0.0521804	0.645266	0.0808796	0	0	0	0
NER	Niger	SSA	MIS	2021	207	4681	4681	0.16129	0.0207221	0.395642	0.371502	0.0508438	4674	0.23834	0.0558408	0.67116	0.0346598	0	0	0	0
NGA	Nigeria	SSA	MICS	2007	1110	19565	19274	0.344921	0.0453461	0.1157	0.22258	0.271454	19139	0.303255	0.0955118	0.303882	0.297351	0	0	0	0
NGA	Nigeria	SSA	DHS	2008	886	33649	33639	0.392461	0.0728619	0.0995868	0.191444	0.243646	33282	0.3702	0.124422	0.354276	0.151103	0	0	0	0
NGA	Nigeria	SSA	MIS	2010	239	5832	5817	0.414303	0.106412	0.106756	0.173629	0.1989	5813	0.292964	0.14588	0.322553	0.238603	0	0	0	0
NGA	Nigeria	SSA	MICS	2011	1480	29349	28944	0.4195	0.0989151	0.104098	0.161208	0.21628	28975	0.275686	0.143779	0.362312	0.218223	29067	0.121616	0.136719	0.741666
NGA	Nigeria	SSA	DHS	2013	896	38522	38459	0.460854	0.105203	0.106607	0.136535	0.190801	38472	0.370685	0.15614	0.313085	0.16009	38378	0.102168	0.608239	0.289593
NGA	Nigeria	SSA	MIS	2015	308	7305	7305	0.453525	0.168104	0.110062	0.111431	0.156879	7298	0.315429	0.182242	0.289805	0.212524	0	0	0	0
NGA	Nigeria	SSA	MICS	2017	2239	35747	33819	0.443863	0.172891	0.0965729	0.136935	0.149738	33796	0.303142	0.199757	0.293644	0.203456	33653	0.124417	0.749621	0.125962
NGA	Nigeria	SSA	DHS	2018	1389	39964	39964	0.469172	0.0645581	0.1109	0.216695	0.138675	39941	0.351894	0.180066	0.28119	0.186851	39964	0.273721	0.519367	0.206911
NGA	Nigeria	SSA	MICS	2021	2079	41532	39539	0.526973	0.152432	0.0634563	0.114621	0.142518	39463	0.292147	0.222918	0.305223	0.179713	39632	0.265366	0.136455	0.598178
NGA	Nigeria	SSA	MIS	2021	567	13662	13662	0.473723	0.155761	0.163519	0.103352	0.103645	13627	0.307698	0.331107	0.218537	0.142658	0	0	0	0
NGA	Nigeria	SSA	DHS	2024	1380	39675	39675	0.498576	0.1969	0.0783365	0.098828	0.12736	39626	0.2995	0.34707	0.226215	0.127214	39675	0.336509	0.41414	0.249351
NIC	Nicaragua	LAC	ENDESA	2012	732	19675	19522	0.157976	0.0330909	0.650394	0.104088	0.0544514	19663	0.104867	0.593297	0.110004	0.191832	0	0	0	0
NPL	Nepal	SA	DHS	2006	260	8639	8639	0.358028	0.0299803	0.401783	0.027318	0.182892	8638	0.0870572	0.295902	0.496643	0.120398	0	0	0	0
NPL	Nepal	SA	DHS	2011	289	10783	10783	0.320597	0.0165075	0.533896	0.0257813	0.103218	10783	0.167393	0.425485	0.320504	0.0866178	10779	0.479358	0.51925	0.00139159
NPL	Nepal	SA	MICS	2014	519	12975	12340	0.283063	0.0538898	0.590681	0.010859	0.0615073	12310	0.275873	0.52234	0.190414	0.0113729	12405	0.787183	0.183313	0.0295042
NPL	Nepal	SA	DHS	2016	196	5654	5654	0.402193	0.0588964	0.499823	0.0130881	0.0259993	5653	0.20467	0.60605	0.174244	0.0150363	5654	0.494694	0.503714	0.00159179
NPL	Nepal	SA	MICS	2019	512	12800	12597	0.29634	0.0754148	0.599984	0.00690641	0.0213543	12609	0.33254	0.607899	0.0482195	0.0113411	12655	0.805927	0.175978	0.0180956
NPL	Nepal	SA	DHS	2022	476	13755	13755	0.299964	0.0666667	0.609669	0.00632497	0.0173755	13305	0.50139	0.424201	0.0679444	0.00646374	13755	0.681788	0.31494	0.00327154
PAK	Pakistan	SA	DHS	2006	972	95339	13549	0.535169	0.0333604	0.364455	0.0238394	0.0431766	13542	0.0890563	0.476444	0.302466	0.132034	0	0	0	0
PAK	Pakistan	SA	DHS	2012	498	12943	12373	0.407015	0.0683747	0.456074	0.0213368	0.0471995	12907	0.295034	0.486868	0.144573	0.073526	12929	0.533065	0.347049	0.119886
PAK	Pakistan	SA	DHS	2017	561	14431	14018	0.443002	0.0950207	0.377871	0.0211157	0.0629904	14390	0.304934	0.538916	0.0982627	0.0578874	14426	0.611951	0.312769	0.0752807
PAN	Panama	LAC	MICS	2013	544	10951	9854	0.0156282	0.0457682	0.822915	0.0162371	0.099452	9841	0.344579	0.493751	0.105375	0.0562951	0	0	0	0
PER	Peru	LAC	DHS	2007	1604	41908	36288	0.0447806	0.110615	0.709877	0.0631614	0.0715664	40772	0.0786324	0.440081	0.212891	0.268395	0	0	0	0
PER	Peru	LAC	DHS	2009	976	24341	24341	0.0466291	0.0905879	0.738712	0.0619531	0.0621174	24047	0.0780139	0.418805	0.214247	0.288934	0	0	0	0
PER	Peru	LAC	DHS	2010	976	24130	24130	0.0510982	0.0987982	0.741359	0.0539992	0.0547451	24115	0.101804	0.435248	0.200166	0.262783	0	0	0	0
PER	Peru	LAC	DHS	2011	976	24041	24041	0.0401814	0.109438	0.745435	0.0519529	0.0529928	24033	0.0885449	0.46199	0.176258	0.273208	0	0	0	0
PER	Peru	LAC	DHS	2012	1226	24169	24169	0.0341346	0.130043	0.733915	0.0539534	0.047954	24157	0.102703	0.480275	0.15511	0.261912	0	0	0	0
PHL	Philippines	EAP	DHS	2008	686	10713	10676	0.301705	0.294211	0.335144	0.0338142	0.0351255	10710	0.186461	0.656209	0.107283	0.0500467	0	0	0	0
PHL	Philippines	EAP	DHS	2013	800	14766	14766	0.219626	0.391237	0.325952	0.0289178	0.0342679	14633	0.0938974	0.799494	0.0732591	0.0333493	0	0	0	0
PHL	Philippines	EAP	DHS	2017	1249	27421	27421	0.191167	0.443456	0.303964	0.0225739	0.0388388	27281	0.105568	0.798358	0.0535904	0.0424838	27421	0.820539	0.118012	0.0614493
PHL	Philippines	EAP	DHS	2022	1247	30309	30309	0.133426	0.582005	0.251641	0.0169917	0.0159359	30244	0.0837852	0.846647	0.0407684	0.0287991	30309	0.928272	0.0374146	0.0343132
PNG	Papua New Guinea	EAP	DHS	2017	767	15941	15911	0.0483313	0.288982	0.180881	0.0993024	0.382503	15888	0.209277	0.107565	0.18215	0.501007	15840	0.30947	0.304419	0.386111
PRY	Paraguay	LAC	MICS	2016	499	8008	7235	0.0544575	0.162267	0.733932	0.0319281	0.0174153	7241	0.305897	0.493026	0.0124292	0.188648	7313	0.837823	0.0704225	0.0917544
PSE	Palestine	MENA	MICS	2010	583	13891	12175	0.0258727	0.395647	0.57848	0	0	12243	0.152577	0.836233	0.00571755	0.00547251	0	0	0	0
PSE	Palestine	MENA	MICS	2014	400	10000	9115	0.0280856	0.3322	0.638837	0.000329128	0.000548546	9110	0.113282	0.883974	0.000109769	0.00263447	0	0	0	0
PSE	Palestine	MENA	MICS	2020	420	10080	9315	0.00772947	0.294686	0.697155	0.000107354	0.000322061	9301	0.304483	0.675626	0.00150521	0.0183851	9326	0.929659	0.0266995	0.0436414
RWA	Rwanda	SSA	DHS	2005	462	10124	10118	0.196778	0.320617	0.28899	0.00612769	0.187488	10117	0.941781	0.0131462	0.0450726	0	0	0	0	0
RWA	Rwanda	SSA	DHS	2008	249	7319	7297	0.236124	0.25161	0.375223	0.00150747	0.135535	7272	0.959158	0.0137514	0.0270902	0	0	0	0	0
RWA	Rwanda	SSA	DHS	2010	492	12450	12444	0.0484571	0.382594	0.313484	0.0318226	0.223642	12353	0.747915	0.00833806	0.013519	0.230227	12438	0.023798	0.428686	0.547516
RWA	Rwanda	SSA	MIS	2013	159	4750	4750	0.0351579	0.423158	0.348211	0.0141053	0.179368	4746	0.636325	0.00927097	0.0233881	0.331016	0	0	0	0
RWA	Rwanda	SSA	DHS	2015	492	12631	12626	0.0337399	0.324806	0.384445	0.0171868	0.239823	12601	0.698754	0.0198397	0.0378541	0.243552	12619	0.0484191	0.718203	0.233378
RWA	Rwanda	SSA	MIS	2017	164	4847	4845	0.0396285	0.354592	0.391331	0.00970072	0.204747	4815	0.818899	0.0207684	0.0188993	0.141433	0	0	0	0
RWA	Rwanda	SSA	DHS	2019	500	12884	12884	0.0401273	0.319699	0.445281	0.0163769	0.178516	12884	0.690158	0.0269326	0.0307358	0.252173	12884	0.238901	0.592595	0.168504
SDN	Sudan	SSA	MICS	2010	560	14000	13634	0.213804	0.292944	0.346487	0.0818542	0.0649113	13215	0.332123	0.0336739	0.351646	0.282558	0	0	0	0
SDN	Sudan	SSA	MICS	2014	680	17000	15665	0.0370252	0.131503	0.60249	0.0836259	0.145356	15523	0.320879	0.0520518	0.319461	0.307608	15825	0.294092	0.1097	0.596209
SEN	Senegal	SSA	DHS	2005	376	7363	7363	0.396034	0.00421024	0.558468	0.0298791	0.0114084	7324	0.448252	0.293146	0.258602	0	0	0	0	0
SEN	Senegal	SSA	MIS	2006	150	3050	3048	0.582349	0.0082021	0.38189	0.0249344	0.00262467	3029	0.411357	0.343348	0.245295	0	0	0	0	0
SEN	Senegal	SSA	MIS	2008	320	9240	9208	0.319939	0.0128149	0.342311	0.283232	0.0417029	9192	0.175696	0.315927	0.260553	0.247824	0	0	0	0
SEN	Senegal	SSA	DHS	2010	391	7902	7902	0.138699	0.0180967	0.553025	0.273981	0.0161984	7900	0.238228	0.171392	0.240127	0.350253	7902	0.145533	0.783346	0.0711212
SEN	Senegal	SSA	DHS	2012	200	4160	4160	0.0858173	0.0408654	0.580769	0.283413	0.00913462	4130	0.338257	0.170944	0.23753	0.253269	4160	0.100721	0.891827	0.00745192
SEN	Senegal	SSA	DHS	2014	200	4206	4206	0.0891583	0.0370899	0.605088	0.259154	0.00951022	4204	0.338249	0.144624	0.211465	0.305661	4206	0.142891	0.832382	0.0247266
SEN	Senegal	SSA	DHS	2015	214	4487	4487	0.11901	0.03655	0.535324	0.302875	0.00624025	4462	0.275661	0.209996	0.189153	0.32519	4487	0.142857	0.775351	0.0817918
SEN	Senegal	SSA	DHS	2016	214	4420	4420	0.1181	0.0529412	0.599774	0.220588	0.00859729	4400	0.322273	0.197273	0.178636	0.301818	4420	0.0837104	0.827602	0.0886878
SEN	Senegal	SSA	DHS	2017	400	8333	8333	0.0885635	0.0519621	0.633625	0.214689	0.0111604	8251	0.220458	0.409405	0.160708	0.209429	8333	0.187087	0.207368	0.605544
SEN	Senegal	SSA	DHS	2018	214	4576	4576	0.114073	0.0684003	0.576923	0.234703	0.00590035	4517	0.287359	0.390303	0.147664	0.174673	4576	0.207823	0.182692	0.609484
SEN	Senegal	SSA	DHS	2019	214	4520	4520	0.0982301	0.0772124	0.609956	0.212389	0.00221239	4491	0.268092	0.40481	0.147183	0.179915	4520	0.189602	0.192699	0.617699
SEN	Senegal	SSA	MIS	2020	207	4903	4903	0.186213	0.0116255	0.535794	0.250051	0.0163165	4881	0.218193	0.303626	0.119238	0.358943	0	0	0	0
SEN	Senegal	SSA	DHS	2023	399	8389	8389	0.0951246	0.057933	0.70962	0.128621	0.00870187	8323	0.278625	0.425327	0.10489	0.191157	8389	0.243772	0.356777	0.399452
SLE	Sierra Leone	SSA	MICS	2005	320	6044	6031	0.25485	0.0106118	0.206102	0.0797546	0.448682	5876	0.285228	0.0265487	0.340368	0.347856	0	0	0	0
SLE	Sierra Leone	SSA	DHS	2008	353	7159	7146	0.301707	0.0174923	0.238455	0.13602	0.306325	7075	0.431378	0.0416961	0.241413	0.285512	0	0	0	0
SLE	Sierra Leone	SSA	MICS	2010	480	11923	11354	0.35406	0.0173507	0.205654	0.0945041	0.328431	11296	0.379249	0.0357649	0.299221	0.285765	11370	0.156025	0.511258	0.332718
SLE	Sierra Leone	SSA	DHS	2013	435	12629	12608	0.401967	0.041085	0.167037	0.0897843	0.300127	12594	0.463713	0.0373988	0.21804	0.280848	12520	0.0633387	0.826518	0.110144
SLE	Sierra Leone	SSA	MIS	2016	336	6669	6669	0.362723	0.0431849	0.230169	0.0616284	0.302294	6666	0.388089	0.0352535	0.222772	0.353885	0	0	0	0
SLE	Sierra Leone	SSA	MICS	2017	600	15605	15290	0.398234	0.0768476	0.136102	0.106867	0.281949	15249	0.367368	0.0534461	0.219359	0.359827	15309	0.215429	0.16487	0.619701
SLE	Sierra Leone	SSA	DHS	2019	313	7208	7208	0.422447	0.0417592	0.121532	0.0936459	0.320616	7208	0.453524	0.0235849	0.247087	0.275805	7208	0.181743	0.255411	0.562847
SLV	El Salvador	LAC	MICS	2014	708	14160	12466	0.0871972	0.23544	0.646639	0.008824	0.0218996	12484	0.371035	0.490147	0.0271548	0.111663	12507	0.864476	0.0425362	0.0929879
SOM	Somalia	SSA	MICS	2006	250	5449	5306	0.0618168	0.127403	0.228044	0.163023	0.419714	5426	0.307409	0.0759307	0.535569	0.081091	0	0	0	0
SSD	South Sudan	SSA	MICS	2010	398	9950	9333	0.534876	0.106397	0.0720026	0.148398	0.138326	9055	0.131309	0.00265047	0.663059	0.202982	0	0	0	0
STP	Sao Tome and Principe	SSA	DHS	2008	104	3516	3516	0.0125142	0.0602958	0.827929	0.00853242	0.0907281	3498	0.193539	0.139794	0.666667	0	0	0	0	0
STP	Sao Tome and Principe	SSA	MICS	2014	131	3930	3477	0.0069025	0.0356629	0.880357	0.00258844	0.0744895	3463	0.26942	0.140052	0.557898	0.0326307	3492	0.409221	0.116552	0.474227
STP	Sao Tome and Principe	SSA	MICS	2019	127	3728	3420	0.00643275	0.0280702	0.926023	0.00263158	0.0368421	3404	0.261751	0.223267	0.477673	0.037309	3423	0.51972	0.146363	0.333918
SUR	Suriname	LAC	MICS	2006	242	4074	4011	0.0152082	0.188731	0.723012	0.0017452	0.0713039	4044	0.153808	0.737883	0.0759149	0.0323937	0	0	0	0
SUR	Suriname	LAC	MICS	2010	440	9196	7240	0.00635359	0.298343	0.613122	0.00455801	0.0776243	7214	0.176878	0.657749	0.133075	0.0322983	7282	0.668498	0.0390003	0.292502
SUR	Suriname	LAC	MICS	2018	454	9187	7587	0.00830368	0.278371	0.699091	0.00184526	0.0123896	7571	0.0865143	0.850878	0.0215295	0.0410778	7631	0.666492	0.0499279	0.28358
SWZ	Eswatini	SSA	DHS	2006	275	4789	4789	0.101691	0.0377949	0.591146	0.0914596	0.177908	4782	0.557507	0.268507	0.173986	0	0	0	0	0
SWZ	Eswatini	SSA	MICS	2010	365	5475	4828	0.0602734	0.0604805	0.64768	0.0229909	0.208575	4829	0.570719	0.242079	0.129841	0.0573618	4831	0.525564	0.218381	0.256055
SWZ	Eswatini	SSA	MICS	2014	347	5211	4862	0.104484	0.0660222	0.579186	0.0542986	0.19601	4856	0.613674	0.204695	0.112232	0.0693987	4865	0.294347	0.0774923	0.62816
SWZ	Eswatini	SSA	MICS	2022	351	5265	4654	0.0887409	0.117318	0.630855	0.0201977	0.142888	4660	0.646352	0.204721	0.0497854	0.0991416	2503	0.587295	0.224131	0.188574
SYR	Syria	MENA	MICS	2006	1002	16659	16633	0.063849	0.121145	0.809836	0.00348704	0.0016834	16647	0.170061	0.804589	0.00997177	0.0153781	0	0	0	0
TCD	Chad	SSA	MICS	2010	459	17668	16341	0.26204	0.00348816	0.277094	0.394774	0.0626033	16241	0.148205	0.0119451	0.619297	0.220553	16356	0.28864	0.225544	0.485816
TCD	Chad	SSA	DHS	2014	624	17018	16995	0.37358	0.010356	0.161047	0.339924	0.115093	16927	0.113428	0.0128198	0.716666	0.157086	11197	0.0554613	0.72832	0.216219
TCD	Chad	SSA	MICS	2019	769	19217	18863	0.389917	0.0300588	0.184329	0.253141	0.142554	18861	0.143259	0.00721065	0.687079	0.162452	18967	0.402541	0.26177	0.335688
TGO	Togo	SSA	MICS	2006	300	4634	4634	0.211696	0.0205006	0.383686	0.198101	0.186016	4604	0.21199	0.0851434	0.591008	0.111859	0	0	0	0
TGO	Togo	SSA	MICS	2010	448	6651	6036	0.318091	0.0230285	0.24884	0.21173	0.19831	6007	0.227068	0.104545	0.592808	0.0755785	6033	0.140063	0.147025	0.712912
TGO	Togo	SSA	DHS	2013	330	9473	9466	0.363512	0.042996	0.260406	0.171561	0.161525	9406	0.226451	0.160217	0.544546	0.0687859	9453	0.10018	0.703798	0.196022
TGO	Togo	SSA	MICS	2017	360	7204	6808	0.416275	0.0525852	0.26792	0.156287	0.106933	6788	0.24558	0.14452	0.509576	0.100324	6815	0.192517	0.109905	0.697579
TGO	Togo	SSA	MIS	2017	171	4891	4891	0.381313	0.0460029	0.272132	0.156614	0.143938	4886	0.260336	0.152272	0.5	0.0873926	0	0	0	0
THA	Thailand	EAP	MICS	2005	1448	28756	28696	0.0833217	0.669675	0.214525	0.0222331	0.0102453	28749	0.0189224	0.973251	0.00646979	0.00135657	0	0	0	0
THA	Thailand	EAP	MICS	2013	1350	26850	24106	0.0584502	0.681863	0.241807	0.00933378	0.00854559	24096	0.0157288	0.979997	0.00215803	0.00211653	0	0	0	0
THA	Thailand	EAP	MICS	2016	1579	31010	28647	0.0494293	0.68433	0.251824	0.0123922	0.00202464	28651	0.0396845	0.954975	0.00352518	0.00181495	28649	0.765332	0.0908583	0.14381
THA	Thailand	EAP	MICS	2019	1958	40660	33745	0.0346718	0.624389	0.33119	0.0084457	0.0013039	35576	0.0445806	0.946284	0.00236114	0.00677423	35604	0.84923	0.0794855	0.0712841
THA	Thailand	EAP	MICS	2022	1727	34540	28114	0.0278153	0.770684	0.196379	0.002561	0.002561	29992	0.033709	0.964057	0.000533476	0.00170045	30008	0.792889	0.0605172	0.146594
TJK	Tajikistan	ECA	MICS	2005	290	6112	6005	0.053622	0.0672773	0.614821	0.00449625	0.259784	6092	0.690414	0.246881	0.0154301	0.0472751	0	0	0	0
TJK	Tajikistan	ECA	DHS	2012	356	6416	6406	0.0892913	0.0668124	0.682797	0.01202	0.149079	6407	0.703918	0.258779	0.00780396	0.029499	6416	0.771041	0.223348	0.00561097
TJK	Tajikistan	ECA	DHS	2017	366	7816	7816	0.0882805	0.0593654	0.735415	0.00396622	0.112973	7816	0.71827	0.273669	0	0.00806039	7816	0.73631	0.220317	0.0433726
TJK	Tajikistan	ECA	DHS	2023	370	8019	8019	0.111859	0.0253149	0.81681	0.00436463	0.0416511	8016	0.683134	0.303019	0.0012475	0.0125998	8019	0.815812	0.154757	0.0294301
TKM	Turkmenistan	ECA	MICS	2006	252	4365	4362	0.183861	0.254929	0.523155	0.00389729	0.0341586	4363	0.710291	0.277791	0.0036672	0.0082512	0	0	0	0
TKM	Turkmenistan	ECA	MICS	2016	305	6101	5861	0.155605	0.25354	0.584883	0.000341239	0.00563044	5861	0.644088	0.355741	0.000170619	0	5861	0.994711	0.000853097	0.0044361
TKM	Turkmenistan	ECA	MICS	2019	318	6361	6195	0.11364	0.499919	0.385956	0.000161421	0.000322841	6195	0.603228	0.392252	0.000161421	0.00435835	0	0	0	0
TKM	Turkmenistan	ECA	MICS	2024	340	6800	6658	0.150796	0.387954	0.460048	0.00120156	0	6658	0.487984	0.510063	0	0.00195254	6658	0.928807	0.00660859	0.064584
TLS	Timor-Leste	EAP	DHS	2009	455	11393	11392	0.0920822	0.0811973	0.440836	0.0839185	0.301966	10422	0.290155	0.238246	0.436481	0.035118	0	0	0	0
TLS	Timor-Leste	EAP	DHS	2016	455	11449	11449	0.107171	0.0930212	0.61394	0.0379072	0.147961	11449	0.441436	0.184994	0.250415	0.123155	11449	0.24465	0.653245	0.102105
TON	Tonga	EAP	MICS	2019	139	2751	2479	0.000403388	0.17023	0.0500202	0	0.779347	2489	0.119325	0.855364	0.0012053	0.0241061	2498	0.76301	0.204163	0.0328263
TUN	Tunisia	MENA	MICS	2012	480	9600	9158	0.0181262	0.312404	0.637475	0.0135401	0.0184538	9165	0.282051	0.660011	0.0425532	0.0153846	9168	0.787195	0.0601003	0.152705
TUN	Tunisia	MENA	MICS	2018	600	11996	11145	0.034096	0.515029	0.436249	0.00637057	0.00825482	11219	0.252429	0.729566	0.00935912	0.00864605	11225	0.903964	0.0345657	0.0614699
TUN	Tunisia	MENA	MICS	2023	500	11000	8896	0.0492356	0.435364	0.5	0.00573291	0.00966727	8907	0.359942	0.593354	0.00617492	0.0405299	8937	0.827906	0.0508	0.121293
TUR	Turkey	ECA	DHS	2008	633	10504	0	0	0	0	0	0	10450	0.207273	0.788325	0.00440191	0	0	0	0	0
TUR	Turkey	ECA	DHS	2013	641	11779	11775	0.0476433	0.368238	0.572654	0.00399151	0.00747346	11754	0.141143	0.825506	0.00280755	0.0305428	0	0	0	0
TUR	Turkey	ECA	DHS	2018	750	11049	11049	0.0284189	0.336592	0.61182	0.015024	0.00814553	11009	0.149605	0.837133	0.00145336	0.0118085	0	0	0	0
TUV	Tuvalu	EAP	MICS	2020	59	772	629	0.00158983	0.90779	0.09062	0	0	628	0.0302548	0.928344	0.022293	0.0191083	631	0.941363	0.0396197	0.0190174
TZA	Tanzania	SSA	AIS	2007	385	6307	6305	0.39429	0.101348	0.313561	0.00475813	0.186043	6297	0.0797205	0	0.155312	0.764967	0	0	0	0
TZA	Tanzania	SSA	DHS	2010	475	9623	9622	0.34629	0.0282686	0.388069	0.0161089	0.221264	9595	0.236894	0.0183429	0.169046	0.575717	0	0	0	0
TZA	Tanzania	SSA	AIS	2012	583	10024	10024	0.194234	0.0348164	0.390263	0.17488	0.205806	9975	0.230777	0.0250627	0.138647	0.605514	0	0	0	0
TZA	Tanzania	SSA	DHS	2015	608	12476	12476	0.169285	0.0624399	0.433312	0.154617	0.180346	12433	0.342797	0.0256575	0.11196	0.519585	12476	0.454473	0.317249	0.228278
TZA	Tanzania	SSA	MIS	2017	442	9292	9292	0.122471	0.0744727	0.437043	0.194038	0.171976	9266	0.265918	0.110404	0.0763005	0.547378	0	0	0	0
TZA	Tanzania	SSA	DHS	2022	628	15621	15609	0.152284	0.0582997	0.548722	0.122301	0.118393	15607	0.483501	0.0577305	0.0898315	0.368937	15621	0.070226	0.05467	0.875104
UGA	Uganda	SSA	DHS	2006	368	8753	8753	0.531932	0.0118816	0.150805	0.186793	0.118588	8731	0.486657	0.0172947	0.146375	0.349674	0	0	0	0
UGA	Uganda	SSA	MIS	2009	170	4378	4372	0.531793	0.10247	0.185499	0.00571821	0.17452	4360	0.446101	0.0236239	0.100229	0.430046	0	0	0	0
UGA	Uganda	SSA	AIS	2011	470	11340	11252	0.338518	0.191255	0.209296	0.103004	0.157927	11291	0.333451	0.0256842	0.106279	0.534585	0	0	0	0
UGA	Uganda	SSA	DHS	2011	404	8948	8948	0.471949	0.0344211	0.245083	0.135449	0.113098	8915	0.454851	0.0337633	0.12765	0.383735	8931	0.0756914	0.755235	0.169074
UGA	Uganda	SSA	MIS	2014	210	5314	5304	0.456259	0.110483	0.198718	0.119721	0.114819	5288	0.264183	0.02118	0.0981467	0.61649	0	0	0	0
UGA	Uganda	SSA	DHS	2016	696	19433	19351	0.468038	0.115291	0.201282	0.0833032	0.132086	19355	0.318057	0.0276414	0.0922242	0.562077	19433	0.245047	0.331755	0.423198
UGA	Uganda	SSA	MIS	2018	340	8912	8862	0.515008	0.0745881	0.211126	0.0972692	0.102009	8887	0.387082	0.0198042	0.0793294	0.513784	0	0	0	0
UGA	Uganda	SSA	MIS	2024	322	9437	9437	0.464342	0.112324	0.271273	0.0722687	0.0797923	9421	0.451969	0.0424583	0.065492	0.440081	0	0	0	0
UZB	Uzbekistan	ECA	MICS	2006	375	8893	8868	0.156743	0.0693505	0.748196	0.00214253	0.0235679	8893	0.764646	0.230518	0	0.00483526	0	0	0	0
UZB	Uzbekistan	ECA	MICS	2022	556	15627	4114	0.110598	0.181575	0.686437	0.00315994	0.0182304	4172	0.70278	0.225791	0	0.0714286	0	0	0	0
VNM	Vietnam	EAP	AIS	2005	251	6337	6337	0.428436	0.207985	0.303298	0.0247751	0.0355058	6336	0.441919	0.420139	0.137942	0	0	0	0	0
VNM	Vietnam	EAP	MICS	2006	212	6079	6075	0.554074	0.163786	0.179753	0.0464198	0.0559671	6024	0.300133	0.347776	0.146414	0.205677	0	0	0	0
VNM	Vietnam	EAP	MICS	2011	598	11874	11580	0.349309	0.312781	0.271071	0.0325561	0.0342832	11567	0.234633	0.562981	0.072361	0.130025	11611	0.922143	0.0560675	0.0217897
VNM	Vietnam	EAP	MICS	2014	510	10200	9971	0.33447	0.323639	0.275499	0.0323939	0.0339986	9926	0.158775	0.660891	0.0699174	0.110417	9979	0.908808	0.0613288	0.0298627
VNM	Vietnam	EAP	MICS	2021	700	14000	13306	0.24147	0.440929	0.281677	0.00894333	0.0269803	13308	0.139465	0.719793	0.0720619	0.0686805	13350	0.848839	0.114682	0.0364794
VUT	Vanuatu	EAP	MICS	2007	119	2243	2241	0.0829987	0.398037	0.41187	0.0263275	0.0807675	2226	0.398922	0.321653	0.0260557	0.253369	0	0	0	0
VUT	Vanuatu	EAP	MICS	2023	237	5112	4320	0.0460648	0.0256944	0.477778	0.0217593	0.428704	4228	0.428808	0.258751	0.0432829	0.269158	4327	0.350589	0.237809	0.411602
WSM	Samoa	EAP	MICS	2020	204	3675	3182	0.00282841	0.125707	0.869893	0.000628536	0.000942803	3180	0.0393082	0.945912	0.00125786	0.013522	3196	0.846996	0.129224	0.0237797
YEM	Yemen	MENA	MICS	2006	199	3115	3073	0.123332	0.271071	0.338757	0.150667	0.116173	3009	0.39681	0.14224	0.216019	0.244932	0	0	0	0
YEM	Yemen	MENA	DHS	2013	781	17272	17252	0.140274	0.275852	0.266752	0.151866	0.165256	17159	0	0.486742	0.25118	0.262078	17247	0.428016	0.471502	0.100481
YEM	Yemen	MENA	MICS	2023	839	21100	19578	0.107365	0.326642	0.353049	0.129942	0.0830013	19640	0.413035	0.164766	0.0910896	0.33111	19694	0.616736	0.269321	0.113943
ZAF	South Africa	SSA	DHS	2016	746	11051	11051	0.0409918	0.05176	0.855669	0.0161976	0.0353814	11048	0.178494	0.546705	0.0305938	0.244207	11051	0.416071	0.455796	0.128133
ZMB	Zambia	SSA	DHS	2007	319	7050	7049	0.129522	0.000851185	0.29451	0.386012	0.189105	7003	0.222904	0.109096	0.249036	0.418963	0	0	0	0
ZMB	Zambia	SSA	DHS	2013	721	15785	15763	0.31003	0.0116095	0.304511	0.224386	0.149464	15761	0.292558	0.123025	0.147008	0.437409	15740	0.125159	0.675349	0.199492
ZMB	Zambia	SSA	DHS	2018	545	12731	12731	0.386066	0.0115466	0.291336	0.187888	0.123164	12723	0.385522	0.124735	0.105871	0.383872	12731	0.187966	0.335952	0.476082
ZMB	Zambia	SSA	DHS	2024	545	12735	12654	0.396317	0.0193615	0.261498	0.202387	0.120436	12709	0.375089	0.158942	0.120938	0.345031	12735	0.2702	0.329721	0.400079
ZWE	Zimbabwe	SSA	DHS	2005	398	9201	8478	0.401864	0.00884643	0.433593	0.130219	0.0254777	9157	0.31506	0.322813	0.313967	0.0481599	0	0	0	0
ZWE	Zimbabwe	SSA	MICS	2009	500	8992	8956	0.428205	0.00390799	0.305159	0.173738	0.0889906	8969	0.294905	0.301929	0.344966	0.0582005	0	0	0	0
ZWE	Zimbabwe	SSA	DHS	2010	406	9655	9655	0.427447	0.0105645	0.349871	0.118902	0.093216	9647	0.311185	0.32238	0.283819	0.0826164	9655	0.254583	0.410254	0.335163
ZWE	Zimbabwe	SSA	MICS	2014	677	16922	15561	0.486087	0.00848275	0.294326	0.135403	0.0757021	15542	0.294171	0.31624	0.272101	0.117488	15566	0.154375	0.828344	0.0172813
ZWE	Zimbabwe	SSA	DHS	2015	400	10470	10470	0.414136	0.0191022	0.389207	0.0914995	0.0860554	10459	0.313606	0.386844	0.206138	0.0934124	10470	0.404871	0.569532	0.0255969
ZWE	Zimbabwe	SSA	MICS	2019	462	12012	11067	0.465257	0.0120177	0.326014	0.12334	0.0733713	11079	0.337937	0.37377	0.214008	0.0742847	11091	0.684339	0.276801	0.0388603
